## Nuclear Receptor 5A (NR5A) Family Regulates 5-Aminolevulinic Acid Synthase 1 (ALAS1) Gene Expression in Steroidogenic Cells

Yunfeng Ju, Tetsuya Mizutani, Yoshitaka Imamichi, Takashi Yazawa, Takehiro Matsumura, Shinya Kawabe, Masafumi Kanno, Akihiro Umezawa, Kenji Kangawa, and Kaoru Miyamoto

Department of Biochemistry, Faculty of Medical Sciences (Y.J., Te.M., Y.I., T.Y., Ta.M., S.K., M.K., K.M.) Translational Research Center, Organization for Life Science Advancement Programs (Te.M., Y.I., T.Y., S.K., K.M.) and Headquarters for the Advancement of High Priority Research (Y.I.), University of Fukui, Fukui 910-1193, Japan; National Research Institute for Child Health and Development (A.U.), Tokyo 157-8535, Japan; and National Cardiovascular Center Research Institute (K.K.), Osaka 565-8565, Japan

5-Aminolevulinic acid synthase 1 (ALAS1) is a rate-limiting enzyme for heme biosynthesis in mammals. Heme is essential for the catalytic activities of P450 enzymes including steroid metabolic enzymes. Nuclear receptor 5A (NR5A) family proteins, steroidogenic factor-1 (SF-1), and liver receptor homolog-1 (LRH-1) play pivotal roles in regulation of steroidogenic enzymes. Recently, we showed that expression of SF-1/LRH-1 induces differentiation of mesenchymal stem cells into steroidogenic cells. In this study, genome-wide analysis revealed that *ALAS1* was a novel SF-1-target gene in differentiated mesenchymal stem cells. Chromatin immunoprecipitation and reporter assays revealed that SF-1/LRH-1 up-regulated *ALAS1* gene transcription in steroidogenic cells via binding to a 3.5-kb upstream region of *ALAS1*. The *ALAS1* gene was up-regulated by overexpression of SF-1/LRH-1 in steroidogenic cells and down-regulated by knockdown of SF-1 in these cells. Peroxisome proliferator-activated receptor- $\gamma$  coactivator-1 $\alpha$ , a coactivator of nuclear receptors, also strongly coactivated expression of NR5A-target genes. Reporter analysis revealed that peroxisome proliferator-activated receptor- $\gamma$  coactivator-1 $\alpha$  strongly augmented *ALAS1* gene transcription caused by SF-1 binding to the 3.5-kb upstream region. Finally knockdown of *ALAS1* resulted in reduced progesterone production by steroidogenic cells. These results indicate that *ALAS1* is a novel NR5A-target gene and participates in steroid hormone production. (*Endocrinology* 153: 5522–5534, 2012)

Orphan nuclear receptor steroidogenic factor 1 [SF-1, also known as Ad4BP, encoded by the nuclear receptor 5A1 (*NR5A1*) gene] plays a pivotal role in regulation of reproductive and endocrine functions at multiple levels during adrenal and gonadal development and differentiation, including regulation of steroidogenesis-related gene expression (1–3). Previously, we reported that bone marrow-derived mesenchymal stem cells (MSCs) are differen-

tiated into steroidogenic cells by expression of SF-1 and treatment with 8-bromo-cAMP (8Br-cAMP) (4). Expression of SF-1 in MSCs induces the expression of steroidogenesis-related genes including steroidogenic acute regulatory protein (StAR) and various steroidogenic enzymes (4). In addition to these genes, we attempted to identify novel SF-1-target genes during differentiation into steroidogenic cells by genome-wide analyses, DNA microarray,

ISSN Print 0013-7227 ISSN Online 1945-7170  
Printed in U.S.A.

Copyright © 2012 by The Endocrine Society  
doi: 10.1210/en.2012-1334 Received March 27, 2012. Accepted August 23, 2012.  
First Published Online September 28, 2012

Abbreviations: ALAS1, 5-Aminolevulinic acid synthase 1; ALAS2, 5-aminolevulinic acid synthase 2; APOA1, apolipoprotein A1; 8Br-cAMP, 8-bromo-cAMP; ChIP, chromatin immunoprecipitation; FOXO1, forkhead box protein O1; GFP, green fluorescent protein; HSD, hydroxysteroid dehydrogenase; LRH-1, liver receptor homolog-1; MOI, multiplicity of infection; MSCs, mesenchymal stem cells; NR5A, nuclear receptor subfamily 5 group A; NRF-1, nuclear respiratory factor-1; PGC-1 $\alpha$ , peroxisome proliferator-activated receptor- $\gamma$  coactivator-1 $\alpha$ ; POR, P450 oxidoreductase; SF-1, steroidogenic factor-1; siSF-1, SF-1-specific siRNA; siRNA, small interfering RNA; shRNA, small hairpin RNA; StAR, steroidogenic acute regulatory protein.

and a promoter tiling array. Using these analyses, we identified 14 SF-1-target genes during MSC differentiation. In this study, we focused on one SF-1 target gene, namely *5-aminolevulinic acid synthase 1* (*ALAS1*), an initiating and rate-limiting enzyme for mammalian heme biosynthesis (5).

ALAS catalyzes a reaction between glycine and succinyl-coenzyme A to form 5-aminolevulinic acid. In humans, ALAS enzymes are encoded by two genes: *ALAS1*, a ubiquitously expressed gene mapped to chromosomal band 3p21, and *5-aminolevulinic acid synthase 2* (*ALAS2*), a erythroid-specific gene mapped to the X chromosome (6). *ALAS1* participates in heme synthesis for all cytochrome family proteins in various tissues, including P450 enzymes in steroidogenic pathways. Heme is essential for the catalytic activities of P450 enzymes, and therefore *ALAS1* may be involved in steroid metabolism. For example, heme affects corticosterone and aldosterone synthesis in the rat adrenal gland (7) and stimulates P450 aromatase activity in human trophoblast cells (8), suggesting that *ALAS1* plays an important role in steroid hormone biosynthesis.

Regulation of *ALAS1* gene expression has been studied mainly in the liver, partly because of abundant expression of P450 drug-metabolizing enzymes in the tissue. In the mouse liver, binding sites for an insulin-sensitive forkhead box protein O1 (FOXO1) and nuclear respiratory factor-1 (NRF-1) within the promoter region of *ALAS1* have been shown to be involved in the induction of *ALAS1* gene expression by fasting (9). Upon exposure to drugs that induce the gene expression of cytochrome P450 and other drug-metabolizing enzymes, *ALAS1* is transcriptionally up-regulated via two enhancer elements at 20 and 16 kb upstream of the transcription start site, resulting in an increase of the biosynthetic rate of heme by cytochrome P450 in the liver (10). However, transcriptional regulation of *ALAS1* in steroidogenic tissues has not been well characterized.

Liver receptor homolog 1 (LRH-1) is another member of the NR5A nuclear receptor family and binds to the same or very similar DNA elements as those for SF-1 binding (11–13). LRH-1 is a transcription factor that mainly participates in the homeostasis of bile acid production in the liver (14, 15). Recently, LRH-1 was found to be active in the ovary as a regulator of steroidogenesis (16). Conditional knockout of LRH-1 in the mouse ovary results in infertility due to failure of ovulation (17). We also have shown that both LRH-1 and SF-1 induce similar changes in the chromatin structure near the *StAR* gene in steroidogenic tissues, particularly in the ovary, to regulate steroid hormone production (18). However, it is unclear whether

LRH-1 can activate *ALAS1* gene expression in the ovary to regulate steroidogenesis.

Peroxisome proliferator-activated receptor- $\gamma$  coactivator-1 $\alpha$  (PGC-1 $\alpha$ ) is a transcriptional coactivator of nuclear receptors and some other transcription factors (19). It regulates adaptive thermogenesis in brown adipose tissues (20), fiber type switching in skeletal muscle (21),  $\beta$ -oxidation of fatty acids (22), and gluconeogenesis (23, 24) in the liver. PGC-1 $\alpha$  is also a coactivator of NRF-1 and FOXO1, both of which directly bind to the *ALAS1* promoter, and is an important factor for controlling *ALAS1* gene expression in the liver (9). Recently, we found that PGC-1 $\alpha$  is expressed in the ovary and acts as a coactivator of both SF-1 and LRH-1 to transactivate NR5A-target genes (25). However, it is unclear whether PGC-1 $\alpha$  acts on the *ALAS1* gene in a coordinated fashion with SF-1 and LRH-1 in steroidogenic tissues.

In this study, we investigate the regulation of *ALAS1* gene expression in steroidogenic cells by examining the upstream region of *ALAS1* using differentiated MSCs and KGN cells (a human granulosa tumor cell line) to reveal the importance of SF-1-binding sites at 3.5 kb upstream of the transcription start site. We will show that LRH-1 and SF-1 play important roles in *ALAS1* gene expression, and PGC-1 $\alpha$  is involved in the transactivation of *ALAS1* gene expression in a coordinated fashion with SF-1 and LRH-1. Finally, we will show the involvement of *ALAS1* in progesterone production by steroidogenic cells.

## Materials and Methods

### Reagents

8Br-cAMP and a GenomePlex Complete Whole Genome Amplification Kit were purchased from Sigma (St. Louis, MO). A Human/Promoter Tiling Array Deluxe was purchased from Roche NimbleGen (Madison, WI; catalog no. C7291-00-02). A Human oligonucleotide glass array (Human Genome U133 Plus 2.0 Array) was purchased from Affymetrix (Santa Clara, CA).  $\nu$ -serum IV was purchased from BD Biosciences (Franklin Lakes, NJ). A dual luciferase reporter assay system, pGL4.11-basic, pGL4.24 containing a minimal promoter, pRL-CMV, and pGL4.74 (hRLuc/TK) vectors were purchased from Promega Corp. (Madison, WI). Trizol reagent, SuperScript III reverse transcriptase, Opti-MEM, a BLOCK-iT Pol II miRNAi Expression Vector Kit with EmGFP, Power SYBR Green PCR Master Mix, murine SF-1-specific siRNA (siSF-1) (Nr5a1MSS240944), Lipofectamine RNAiMAX, Lipofectamine, and Lipofectamine Plus reagents were purchased from Life Technologies (Carlsbad, CA). ExTaq Hot Start Version was purchased from Takara Bio (Otsu, Japan). A human siSF-1 (sc-37901) was purchased from Santa Cruz Biotechnology, Inc. (Santa Cruz, CA). Human siALAS1 (MQ-009276-00-0002), mouse siALAS1 (M-046807-01-0005), and siGENOME Non-Targeting small interfering RNA (siRNA) no.1 (D-001210-01-20) were purchased from

Thermo Scientific (Waltham, MA). A QuickChange site-directed mutagenesis kit was purchased from Agilent Technologies (Santa Clara, CA). KOD-Plus, KOD-FX, and pTA2 vectors were purchased from Toyobo (Osaka, Japan). Enhanced chemiluminescence Western blot reagents and HistoVT One were purchased from Nacalai Tesque (Kyoto, Japan). A Vectastain Elite ABC kit was purchased from Vector Laboratories (Burlingame, CA). A Progesterone EIA Kit (EA74) was purchased from Oxford Biomedical Research (Oxford, MI). All other reagents were obtained from commonly used suppliers.

## Antibodies

Dynabeads protein G and M-280 sheep antimouse IgG were purchased from Life Technologies. Anti-FLAG M2 agarose (A2220), as well as anti-FLAG M2 (F1804) and anti-Flag M2-HRP (A8592) antibodies were purchased from Sigma. Anti-Myc tag (ab9132) and anti-*ALAS1* (ab22153) (for Western blotting) antibodies were purchased from Abcam (Cambridge, MA). An anti-*ALAS1* (LS-B2013) for immunohistochemistry was purchased from LifeSpan Bioscience (Seattle, WA). An anti-Ad4BP/SF-1 for immunohistochemistry was kindly given by Dr. K Morohashi and that for Western blotting was purchased from Millipore Corp. (07-618) (Billerica, MA). Anti-Ku (p80) (MS-285-P1) and anti-Ku (p70) (MS-329-P1) antibodies were purchased from Thermo Scientific (Rockford, IL). Antirabbit IgG, goat, F(ab')<sub>2</sub>, peroxidase conjugated (013-17941), and anti-mouse IgG, goat, F(ab')<sub>2</sub>, peroxidase conjugated (019-17921) were purchased from Wako Pure Chemical Industries (Osaka, Japan).

## Cell culture, transient transfection, luciferase assay, and progesterone production

Human MSC (hMSC) lines, hMSC-hTERT-E6/E7 (26) and UE7T-13 (27), Phoenix cells, and the human granulosa tumor cell line KGN (28) were cultured as described elsewhere. HeLa cells, HepG2 cells, and Y1 cells were maintained in DMEM supplemented with 10% fetal bovine serum and gentamycin. The human adrenocortical tumor cell line H295R (29) was maintained in Opti-MEM supplemented with 2%  $\nu$ -serum IV and gentamycin. H295R cells stably expressing small hairpin RNA (shRNA) were maintained in Opti-MEM supplemented with 2%  $\nu$ -serum IV, blasticidin, and gentamycin. HeLa and KGN cells were transfected using Lipofectamine and Lipofectamine Plus reagents according to the manufacturer's instructions. Luciferase assays were performed as described elsewhere (30). Each data point represented the mean of at least four independent experiments.

For knockdown of *ALAS1* gene, *ALAS1*-targeting siRNA, or nontargeting siRNA were transfected into KGN ( $5 \times 10^4$  cells) or Y1 cells ( $2 \times 10^5$  cells) in a 24-well plate with Lipofectamine RNAiMAX. The final siRNA concentration in the medium was 10 nM. After transfection, KGN cells were treated with or without 8Br-cAMP for 48 h. The medium was replaced every 24 h and was collected for progesterone measurement at the end of the culture. Progesterone concentrations in medium were measured by a Progesterone EIA Kit according to the manufacturer's instructions.

For knockdown of *SF-1* gene, *SF-1*-targeting siRNA or nontargeting siRNA were transfected into Y1 cells with Lipofectamine RNAiMAX. The final siRNA concentration in me-

dium was 10 nM. The cells were treated again 72 h after transduction with the siRNAs and further cultured for 72 h (total 144 h). The cells were collected for measurement of *ALAS1* expression by RT-quantitative PCR and Western blotting at the end of the culture.

SF-1-targeting shRNAs were generated according to the manufacturer's instructions. Plasmids for SF-1-targeting and control shRNAs were linearized with *Apa*LI and then transfected into H295R cells in a six-well plate. Transfected H295R cells were cultured for 48 h and then selected by blasticidin to generate stably transfected cell lines. Two independent cell lines were generated from each transfectant. Primers used for generating shRNA plasmids are shown in Supplemental Table 1 published on The Endocrine Society's Journals Online web site at <http://endo.endojournals.org>.

## Adenovirus and retrovirus preparation and infection

Preparation of adenoviruses expressing Adx-MycSF-1, Adx-MycLRH-1, and Adx-FlagPGC-1 $\alpha$  has been described elsewhere (18, 25). Cells were infected 1 d after plating with adenoviruses expressing green fluorescent protein (GFP) (Adx-GFP), MycSF-1 (Adx-MycSF-1), MycLRH-1 (Adx-MycLRH-1), or FlagPGC-1 $\alpha$  (Adx-FlagPGC-1 $\alpha$ ) and then incubated for 48 h. Retrovirus preparation and infection was performed as described elsewhere (25). MSCs were infected with a retrovirus expressing FlagSF-1 for 48 h and then selected by puromycin to generate stably transfected cell lines. A cell line was chosen from about 20 cell lines to perform chromatin immunoprecipitation (ChIP)-on-chip, ChIP, and gene expression analyses.

## ChIP-on-chip analysis

ChIP-on-chip analysis was performed as described elsewhere (18). Briefly, hMSC-hTERT-E6/E7 cells that were stably expressing Flag-tagged SF-1 ( $1 \times 10^8$  cells) were used to prepare samples for ChIP. Immunoprecipitation with anti-FLAG M2 affinity gel was performed overnight at 4 C with rotation. After washing, reverse cross-linking, and recovering DNA, a whole-genome amplification method was used to amplify sufficient amounts of DNA for hybridization to the microarray. Labeling of samples, DNA hybridization, and scanning of the arrays were performed by NimbleGen. The microarray experiment was performed with a Human/Promoter Tiling Array. Log<sub>2</sub> ratios were computed for a sample pair and, after Tukey biweight normalization, visualized by SignalMap software (Roche NimbleGen).

## Microarray

Expression analysis by DNA microarray has been described elsewhere (31, 32). Briefly, labeled cRNA was prepared from UE7T-13 cells with adenovirus-mediated expression of GFP (Adx-GFP) or MycSF-1 (Adx-MycSF-1). After fragmentation of cRNA, hybridization was performed with a human U133 Plus 2.0 Affymetrix GeneChip (Santa Clara, CA).

## Plasmids

pCMV/Flag- and pCMV/Myc-tagged SF-1 expression vectors (pCMV/FlagSF-1 and pCMV/MycSF-1, respectively), the PGC-1 $\alpha$  expression vector, and retroviral plasmid for expressing Flag-tagged SF-1 (pQCXIP/FlagSF-1) have been described elsewhere (25, 33). Human *ALAS1* upstream regions consisting of

various 5'-ends cloned into the pGL4.11 luciferase basic vector were generated as follows. The 5'-flanking regions (–2981/+106) were amplified by PCR using KOD-FX and genomic DNA from KGN cells as a template, and the PCR product was ligated into pTA2. To create a *SalI* site, the identical region was reamplified using KOD-Plus and pTA2/hALAS1 (–2981/+106) as a template. The PCR product was digested with *SalI*/*HindIII* and ligated into *XhoI*/*HindIII*-digested pGL4.11, which was designated as pGL4/hALAS1 (–2981/+106). The 5'-flanking regions (–3573/+39) were amplified by PCR using KOD-FX and genomic DNA from KGN cells as a template, and PCR products were ligated into pTA2. A *XbaI*/*BglIII* (–3573/+39) fragment from pTA2/hALAS1 (–3573/+39) was ligated into *NheI*/*BglIII*-digested pGL4/hALAS1 (–2981/+106), which was designated as pGL4/hALAS1 (–3573/+106). The 5'-flanking regions (–732/+39) were amplified by PCR with KOD-Plus and pGL4/hALAS1 (–2981/+106) as a template. The PCR product was digested with *HindIII* and ligated into *EcoICRI*/*HindIII*-digested pGL4.11, which was designated as pGL4/hALAS1 (–732/+106). The region at –3573/–3419 was amplified by PCR with KOD-plus and pGL4/hALAS1 (–3573/+106) as a template and digested with *Acc65I*/*XhoI*. The *Acc65I*/*XhoI* fragment was ligated into *Acc65I*/*XhoI*-digested pGL4.24 (a reporter vector with minimal promoter activity), which was designated as pGL4.24/hALAS1 (–3573/–3419). Mutations of SF-1-binding sites in the *ALAS1* promoter (–3573/+106) or the region at –3573/–3419 were created using QuikChange site-directed mutagenesis. Nucleotide numbering was relative to the transcription start site of the human *ALAS1* gene. The nucleotide sequences of all PCR products were confirmed by DNA sequencing. Primers used for plasmid construction are shown in Supplemental Table 2.

## ChIP

ChIP samples were prepared as described elsewhere (18). Each sample was analyzed by a StepOnePlus Real-Time PCR System (Applied Biosystems, Carlsbad, CA). Primers used for ChIP are shown in Supplemental Table 3.

## Real-time RT-PCR and RT-PCR

Real-time RT-PCR (4) and RT-PCR (34) were performed as described elsewhere. Primers used for real-time RT-PCR and RT-PCR are shown in Supplemental Tables 4 and 5, respectively.

## Western blotting

Western blotting was performed as described elsewhere (4). Briefly, cells in a 35- or 60-mm dish were lysed with 200–300  $\mu$ l radioimmunoprecipitation assay buffer. Aliquots of the lysates containing same amounts (20–40  $\mu$ g) of proteins were resolved on 10% or 12.5% SDS-PAGE gels and transferred to polyvinylidene difluoride membranes. Western blot analysis was performed with antibodies described above. All immune complexes were ultimately visualized and quantitated using enhanced chemiluminescence Western blot reagents and a LAS4000 mini (GE Healthcare Japan, Tokyo, Japan).

## Immunohistochemistry

Immunohistochemistry was performed as described previously (25, 33). Briefly, male rat adrenals (6 wk of age) were fixed in 4% paraformaldehyde solution, dehydrated in a graded ethanol series,

and embedded in paraffin wax. Section of 7  $\mu$ m thickness were subjected to an antigen-retrieval technique with HistoVT One and treated with normal rabbit IgG, anti-*ALAS1*, or anti-Ad4BP/SF-1 antibodies. They were developed using a Vectastain Elite ABC kit.

## Statistical analysis

Values are the mean  $\pm$  SE of the mean. Data were analyzed by Student's *t* test.

## Results

Recently, we showed that SF-1/LRH-1 expression induces differentiation of MSCs into steroidogenic cells (4, 33). In this study, we attempted to identify novel SF-1-target

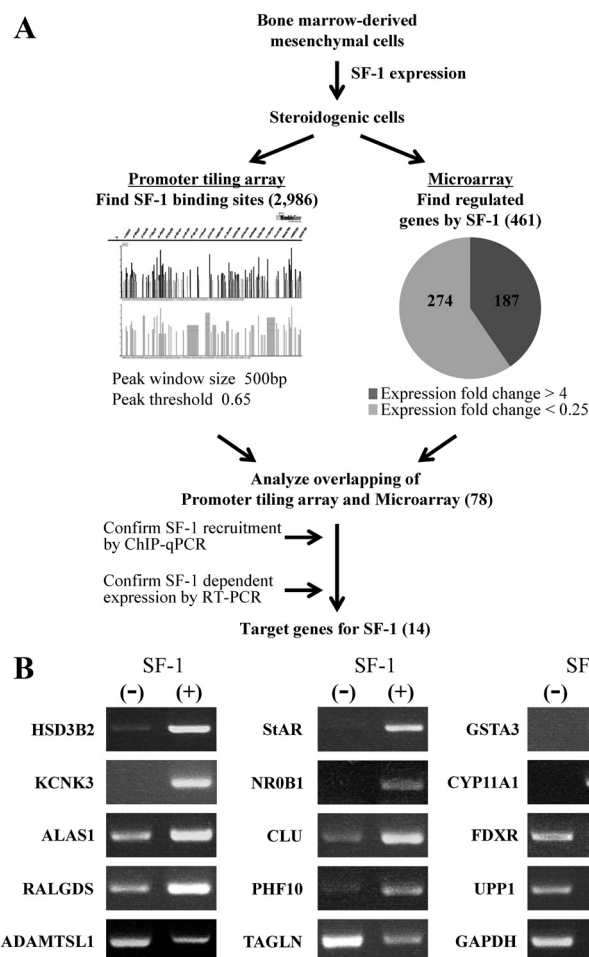

**FIG. 1.** Identification of SF-1-target genes by DNA microarray and ChIP-on-chip analysis. **A**, Scheme for identification of SF-1-target genes. Candidate SF-1-target genes were identified by a promoter tiling array (2986 genes) and DNA microarray (461 genes) using hMSCs with or without expression of SF-1. Overlapping candidate genes (78 genes) were further verified by conventional ChIP and RT-PCR analyses, and 14 genes were finally identified as SF-1-target genes. **B**, Expression of SF-1-target genes in hMSCs by adenovirus-mediated expression of SF-1. Human MSCs were infected with adenoviruses expressing GFP (–) or SF-1 (+). Expression levels of the 14 genes and control *GAPDH* gene were examined by RT-PCR at 2 d after infection.



**TABLE 1.** List of SF-1-target genes as determined by DNA microarray and ChIP-on-chip analysis

| Gene symbol     | Peak score | Peak location (bp)                | Fold change | Accession no. | Description                                                                               |
|-----------------|------------|-----------------------------------|-------------|---------------|-------------------------------------------------------------------------------------------|
| <i>HSD3B2</i>   | 0.75       | 390                               | 319.5       | NM_000198     | Hydroxy- $\delta$ -5-steroid dehydrogenase, 3 $\beta$ - and steroid $\delta$ -isomerase 2 |
| <i>STAR</i>     | 0.76       | 58, –141                          | 289.7       | NM_001007243  | Steroidogenic acute regulator                                                             |
| <i>GSTA3</i>    | 0.94       | 10, 31, 44                        | 77.0        | NM_000847     | Glutathione S-transferase A3                                                              |
| <i>KCNK3</i>    | 1.02, 0.63 | 1142, –472                        | 43.4        | NM_002246     | Potassium channel, subfamily K, member 3                                                  |
| <i>NROB1</i>    | 0.69, 0.66 | –944, –3094                       | 16.2        | NM_000475     | Nuclear receptor subfamily 0, group B, member 1                                           |
| <i>CYP11A1</i>  | 1.06, 0.77 | –854, –1922                       | 13.9        | NM_000781     | Cytochrome P450, family 11, subfamily A, polypeptide 1                                    |
| <i>ALAS1</i>    | 0.69, 0.63 | –3243, –3271, –3328               | 11.7        | NM_199166     | Aminolevulinate, $\delta$ -, synthase 1                                                   |
| <i>CLU</i>      | 0.59, 0.92 | 910, –2283                        | 7.6         | NM_001831     | Clusterin                                                                                 |
| <i>FDXR</i>     | 1.44       | 1101, 1102, 1104                  | 6.1         | NM_024417     | Ferredoxin reductase                                                                      |
| <i>RALGDS</i>   | 0.74, 0.61 | –3562, –3627, –3645               | 5.1         | NM_006266     | Ral guanine nucleotide dissociation stimulator                                            |
| <i>PHF10</i>    | 0.7        | –1617, –1710                      | 4.1         | NM_018288     | PHD finger protein 10                                                                     |
| <i>UPP1</i>     | 0.67       | –3253, –3367, –3578, –3846, –3985 | 0.24        | NM_003364     | Uridine phosphorylase 1                                                                   |
| <i>ADAMTSL1</i> | 0.8        | –607                              | 0.24        | NM_052866     | ADAMTS-like 1                                                                             |
| <i>TAGLN</i>    | 1.09       | –3911, –3968, –3981               | 0.08        | NM_003186     | Transgelin                                                                                |

genes in differentiated cells by genome-wide analyses, a promoter tiling array (ChIP-on-chip), and DNA microarray. Seventy eight genes were double positive among 2986 and 461 positive genes identified by the ChIP-on-chip assay and the expression array, respectively (Fig. 1A). Those genes were individually verified by a conventional ChIP assay and RT-PCR (Fig. 1B and Table 1), and 14 genes were finally identified as SF-1-target genes. In addition to well-known steroidogenesis-related genes such as hydroxysteroid dehydrogenase 3B2 (*HSD3B2*), *StAR*, *NROB1*, and *CYP11A1*, we found that *ALAS1*, *CLU*, *GSTA3*, *KCNK3*, *FDXR*, *PHF10*, and *RALGDS* genes were up-regulated, whereas *ADAMTSL1*, *TAGLN*, and *UPP1* genes were down-regulated (Fig. 1B).

Among the 14 genes, *ALAS1*, a rate-limiting enzyme for heme biosynthesis, was chosen to examine the regulation of gene expression and to reveal the participation of the gene in steroidogenesis.

First, SF-1-binding *in vivo* was examined by a conventional ChIP assay of the upstream region of the *ALAS1* gene in SF-1-transduced hMSCs. As shown in Fig. 2A, SF-1 bound to –3.5 kb upstream of the transcriptional start site of *ALAS1*. The figure also shows positive (*STAR* –158) and negative (*STAR* +6000) controls of the ChIP assay. Similar results were obtained using SF-1-transduced KGN cells derived from a human granulosa tumor (Supplemental Fig. 1).

To examine the effects of the upstream region on the transcriptional activity of *ALAS1*, a luciferase reporter assay was performed using constructs harboring various lengths of the upstream region of the *ALAS1* gene (Fig. 2B). Inconsistent with the fact that the *ALAS1* gene is

expressed in most tissues, basal activities were high in HeLa cells, which do not express SF-1, among all deletion constructs (*white bar*). Expression of SF-1 caused a marked increase in activity only with the construct containing –3573/+106 ( $P < 0.01$ ), suggesting that two putative SF-1-binding sites near –3.5 kb upstream were responsible for the SF-1-dependent activity of *ALAS1* gene expression.

Next, we examined the two putative SF-1-binding sites for *ALAS1* gene transcription by mutation analysis. One construct contained short DNA fragments (–3573/–3419) with a minimal promoter fragment, and another contained long fragments (–3573/+106) without a promoter fragment. Both constructs showed SF-1-dependent activation of the *ALAS1* gene. Mutation analysis (Fig. 2, C and D) revealed that each SF-1-binding site was important for SF-1-dependent activation of *ALAS1* gene transcription.

SF-1-dependent activation of the *ALAS1* gene was further examined using SF-1-transduced and -knock-down cells. Adenovirus mediated transiently expression of SF-1 in hMSCs (Fig. 3, A and B) and retrovirus mediated stably expression in other hMSCs (Fig. 3, C and 3D) revealed that the SF-1-dependent induction of *ALAS1* gene expression occurred in a similar manner to that of the *StAR* gene, a well-known SF-1-target gene. Dose-dependent activation was also observed by transduction of SF-1 into KGN cells that are of a human ovarian granulosa origin (Fig. 3, E and F). Adenovirus-mediated transduction of SF-1 into H295R human adrenocortical cells also resulted in activation of *ALAS1* gene expression (Fig. 3G). On the other hand, suppression of

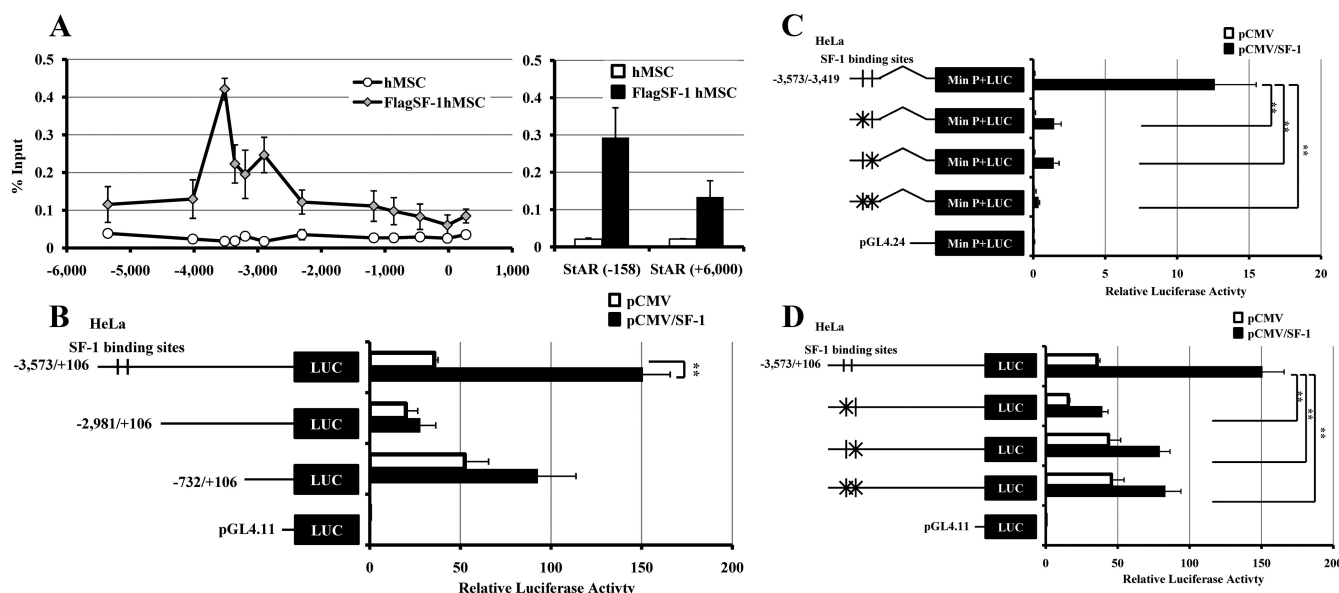

**FIG. 2.** Identification of SF-1-binding sites within the upstream region of the *ALAS1* gene and their roles in *ALAS1* gene transcription. **A**, ChIP analysis of SF-1 binding to the region upstream of the human *ALAS1* gene. Flag-tagged SF-1 was expressed in hMSC-hTERT-E6/E7 cells, a hMSC line, by retroviral infection, and an anti-Flag antibody was used to detect SF-1 binding to the region. Parent cells, hMSC-hTERT-E6/E7, were used as negative control for immunoprecipitation with anti-Flag antibody. A *StAR* promoter region (*StAR* -158) and downstream region (*StAR* +6000) were used as positive and negative controls, respectively. **B**, Luciferase reporter assay of the upstream region of the *ALAS1* gene. Reporter constructs containing DNA fragments of various lengths from the upstream region of the *ALAS1* gene were cotransfected with a control vector (pCMV) or Flag-tagged SF-1 expression vector (pCMV/SF-1) into HeLa cells. Reporter deletion constructs are schematically drawn at the left side of the figure. Luciferase activities were measured at 48 h after transfection. \*\*,  $P < 0.01$  vs. control pCMV. **C**, Effects of mutations in putative SF-1-binding sites -3.5 kb upstream of the *ALAS1* gene on enhancement of luciferase activity of a reporter vector harboring a minimal promoter. Single or double mutations were introduced in two putative SF-1-binding sites in the upstream DNA fragment (-3573/-3419) that was fused to a minimal promoter, and reporter activities were measured by a luciferase assay using HeLa cells with or without expression of SF-1. Mutations in each or both SF-1 sites markedly decrease promoter activity in SF-1-transduced HeLa cells. \*\*,  $P < 0.01$  vs. wild-type construct. **D**, Effects of mutations in putative SF-1-binding sites in the upstream region of the *ALAS1* gene on luciferase activity. Single or double mutations were introduced in the SF-1 sites of a -3573/+106 DNA fragment, and reporter activities were measured by a luciferase assay using HeLa cells with or without expression of SF-1. Mutations in each or both SF-1 sites result in decreased luciferase activity in SF-1-transduced HeLa cells. \*\*,  $P < 0.01$  vs. wild-type construct. LUC, Luciferase; Min, minimal.

endogenous SF-1 gene expression by SF-1-specific short-hairpin RNA or siSF-1 resulted in decreases of both *ALAS1* and *StAR* gene expression in H295R cells (Fig. 3, H and I) or in Y1 cells (Fig. 3, J and K), respectively. Similar results were observed when using KGN cells (Supplemental Fig. 3). Protein levels of *ALAS1* were also declined by SF-1 knockdown both in H295R cells (Fig. 3L) and Y1 cells (Fig. 3M). Immunohistochemical studies showed that *ALAS1* was predominantly expressed in cytoplasm of adrenocortical cells where SF-1 was also expressed but in nucleus of the cells (Fig. 3, N and O). These observations indicate that, although *ALAS1* is expressed in various tissues or organs, it is also a target gene of SF-1 in steroidogenic cells.

There are two members of the NR5A nuclear receptor family, SF-1 and LRH-1 (35). They regulate gene expression via binding to similar response elements and are simultaneously active in steroidogenic tissues, particularly in the ovary, to regulate steroid hormone production (25). LRH-1, but not SF-1, is also a known transcription factor that regulates bile acid production in the liver (14, 15). Therefore, we examined the effects of LRH-1 on *ALAS1*

expression in both KGN cells, of an ovarian origin, and HepG2 cells, of a liver origin. As shown in Fig. 4, A and B, LRH-1 strongly bound to -3.5 kb upstream of the *ALAS1* gene in KGN cells, whereas no specific binding of LRH-1 to the corresponding region was observed in HepG2 cells. In HepG2 cells, LRH-1 bound to the promoter region of apolipoprotein A1 (*APOA1*) that is a known target gene of LRH-1 in hepatic cells (Fig. 4B) (36). The difference in LRH-1 binding between KGN and HepG2 cells may reflect a difference in chromatin structure near -3.5 kb upstream of the *ALAS1* gene between these cell types. Therefore we next examined histone modifications in both KGN cells and HepG2 cells. The levels of H3K4me2 (binding sites of certain DNA-binding proteins) (37) and H3Ac (positive marks of transcription) were increased by transduction of LRH-1 into KGN cells, but not HepG2 cells, to this region (Supplemental Fig. 4). Inconsistent with the above observation, transduction of LRH-1 into KGN cells induced *ALAS1* gene expression in a dose-dependent manner (Fig. 4C), whereas no such induction was observed by transduction of LRH-1 into HepG2 cells (Fig. 4D). Well-

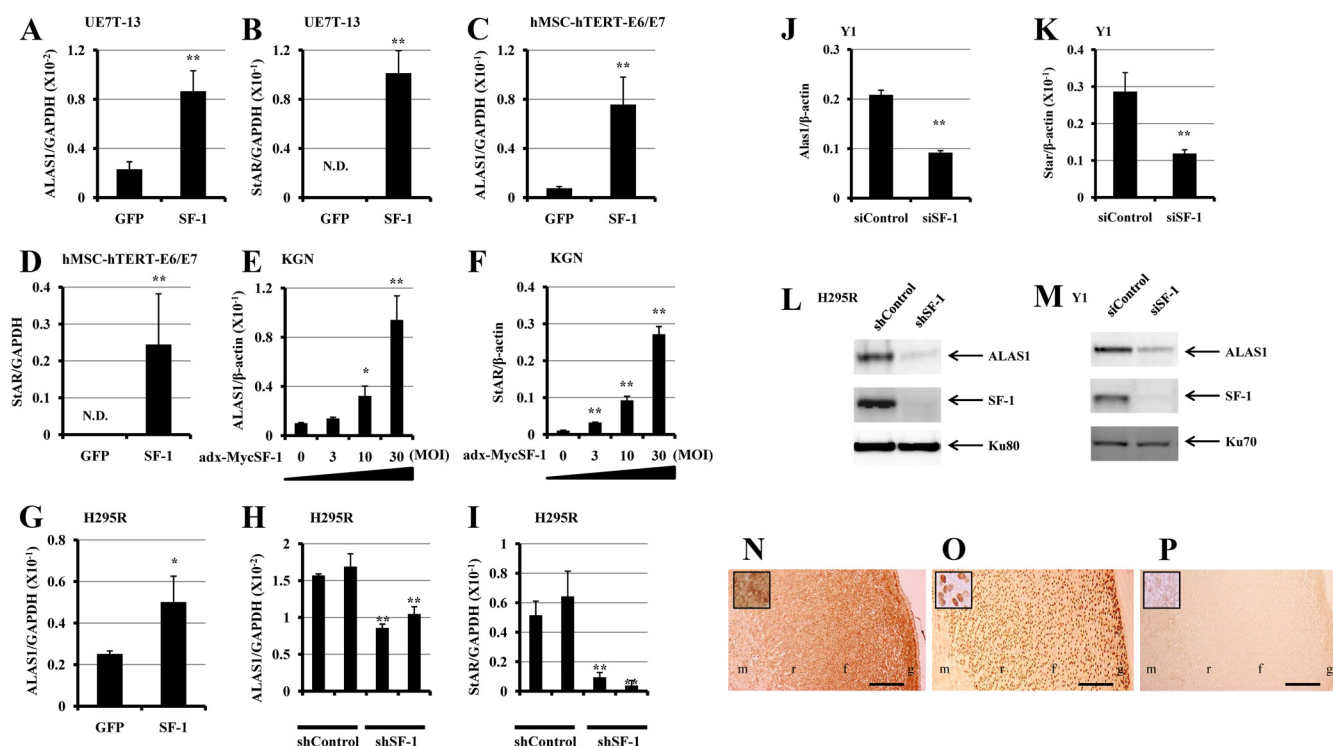

**FIG. 3.** Involvement of SF-1 in transcription of the *ALAS1* gene. hMSCs (UE7T-13) were infected with adenoviruses to transiently express GFP (control) or SF-1, and the gene expression of *ALAS1* (A) and *StAR* (B) was examined at 48 h after infection. The effects of retrovirus-mediated stable expression of GFP (control) and SF-1 on *ALAS1* (C) and *StAR* (D) gene expression were also examined in hMSC-hTERT-E6/E7 cells. Dose-dependent effects of adenovirus-mediated expression of SF-1 on *ALAS1* (E) and *StAR* (F) were examined in KGN cells, a tumor cell line derived from human ovarian granulosa cells. The effects of adenovirus-mediated expression of SF-1 were also examined using H295R cells, a human adrenocortical cell line (G). The effects of knockdown of endogenous SF-1 in H295R cells on *ALAS1* (H) and *StAR* (I) gene expression were examined by stably expressing an shRNA against SF-1 (shSF-1). The effects of knockdown of endogenous SF-1 in Y1 cells on *ALAS1* (J) and *StAR* (K) gene expression were examined by transiently expressing an siRNA against SF-1 (siSF-1). The gene expression of *ALAS1* and *StAR* was measured by real-time RT-PCR, and mRNA levels were normalized against  $\beta$ -actin or *GAPDH*. The effects of knockdown of endogenous SF-1 in H295R cells (L) or Y1 cells (M) on protein levels of *ALAS1* were examined. Localization of *ALAS1* (N) and SF-1 (O) proteins in the rat adrenal gland was examined. Negative control using a nonimmune IgG (P) was also shown. The insets showed higher magnification of zona glomerulosa. m, Adrenal medulla; r, zona reticularis; f, zona fasciculata; g, zona glomerulosa. Scale bar, 100  $\mu$ m. N.D., Not detected. \*,  $P < 0.05$  and \*\*,  $P < 0.01$  vs. control. Note: protein expression of SF-1 in these cells is shown by Western blotting in Supplemental Fig. 2.

known LRH-1-target genes (*StAR* in steroidogenic cells and *APOA1* in hepatic cells) showed induced expression by LRH-1 in corresponding cell types (Fig. 4, C and D). These observations indicate that cell type-specific induction of the *ALAS1* gene in KGN cells was dependent on LRH-1 binding to the  $-3.5$  kb upstream region of the *ALAS1* gene. We previously found that PGC-1 $\alpha$  works together with SF-1 and LRH-1 as a coactivator, which markedly enhances the expression of target genes of the NR5A family (25). In this study, we examined whether PGC-1 $\alpha$  enhanced the expression of *ALAS1* in steroidogenic cells endogenously expressing the NR5A family.

Transduction of PGC-1 $\alpha$  into KGN cells (Fig. 5A) and HepG2 cells (Fig. 5B) markedly increased the expression of *ALAS1* in a dose-dependent manner. PGC-1 $\alpha$  transduction also increased expression of the *StAR* gene in KGN cells (Fig. 5A) and the *APOA1* gene in HepG2 cells (Fig. 5B). These results indicate that PGC-1 $\alpha$  strongly enhanced the expression of *ALAS1* in both ovarian and he-

patic cells in a tissue-specific manner. It is likely that, in contrast to the effects of PGC-1 $\alpha$  in KGN cells, the enhancement of *ALAS1* gene expression in hepatic cells by PGC-1 $\alpha$  may be LRH-1 independent, because LRH-1 did not bind to the upstream region of *ALAS1* in these cells (Fig. 4B).

Next, we examined the importance of SF-1-binding sites near the  $-3.5$  kb upstream region for synergistic activation of the *ALAS1* gene by SF-1 and PGC-1 $\alpha$ . As shown in Fig. 6A, coexpression of SF-1 and PGC-1 $\alpha$  in HeLa cells caused marked synergistic activation of the reporter construct harboring the DNA fragment at  $-3573/-3419$ , which included the two SF-1 sites. Mutations in either SF-1 site caused a marked decrease of *ALAS1* activation, and mutations in both sites completely abolished *ALAS1* activity. Similar synergistic activation was observed when a construct harboring the  $-3573/+106$  region was used (Fig. 6B), whereas little synergistic actions were observed when constructs har-

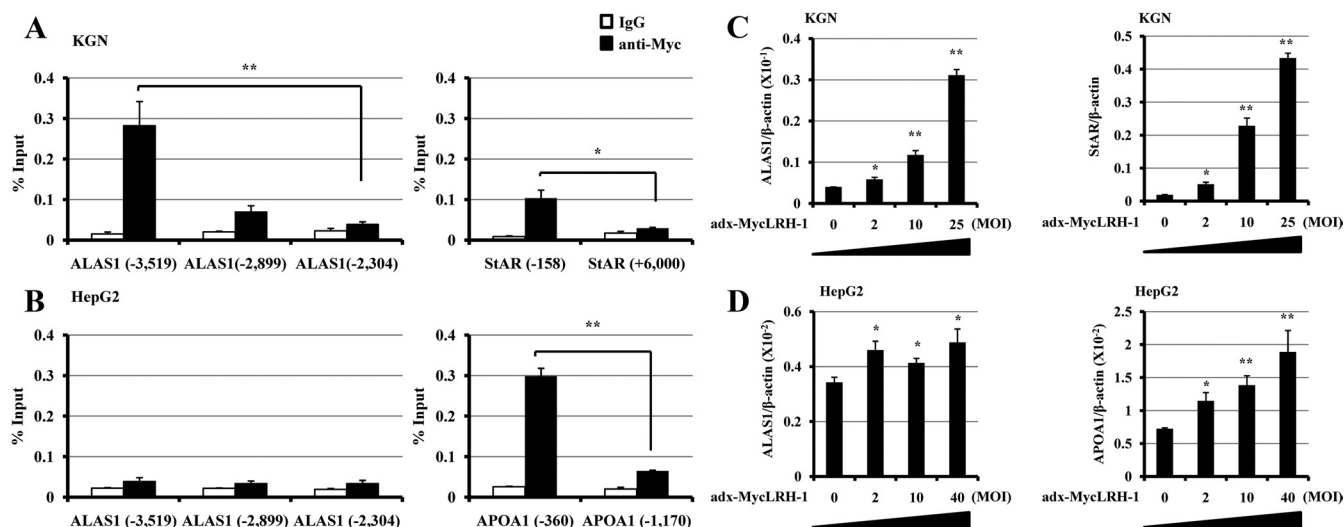

**FIG. 4.** Difference in responses by KGN and HepG2 cells to binding and induction of the *ALAS1* gene by LRH-1. A, LRH-1 binding to the upstream region of the *ALAS1* gene in KGN cells was examined by ChIP analysis. Myc-tagged LRH-1 was expressed in KGN cells by adenovirus infection [10 multiplicity of infection (MOI)], and LRH-1 binding was analyzed by a ChIP assay using an anti-myc antibody or a nonimmune IgG as negative control. Strong binding is observed near  $-3.5$  kb upstream. LRH-1 binding to the neighborhood of the *StAR* gene (LRH-1-target in steroidogenic cells) is shown as positive ( $-158$ ) and negative ( $+6000$ ) controls. B, LRH-1 binding to the upstream region of the *ALAS1* gene in HepG2 cells was also examined. Myc-tagged LRH-1 was expressed in HepG2 cells by adenovirus infection (40 MOI). No specific binding is observed in HepG2 cells, even near the  $-3.5$  kb upstream region. Strong LRH-1-binding is observed at the promoter region of the *APOA1* gene (LRH-1-target in hepatic cells). Numbers refer to the transcription start sites of each gene. C, Dose-dependent induction of *ALAS1* gene expression by adenovirus-mediated transduction of LRH-1 into KGN cells was examined. Induction of *StAR* gene expression is shown as a positive control. D, Effects of adenovirus-mediated transduction of LRH-1 on *ALAS1* gene expression in hepatic HepG2 cells. Induction of *APOA1* gene expression by LRH-1 in HepG2 cells is shown as a positive control. \*, *P* < 0.05; and \*\*, *P* < 0.01 vs. control. Note: protein expression of LRH-1 in these cells is shown by Western blotting in Supplemental Fig. 2.

boring shorter fragments were used. Essentially the same results shown in Fig. 6A were obtained when mutations were introduced within SF-1-binding sites in the  $-3573/+106$  region, although synergistic actions were observed to a lesser extent (Fig. 6C).

Synergistic activations were also observed when KGN cells were used (Fig. 6, D–F). Furthermore, ChIP assays revealed that PGC-1 $\alpha$  also bound to the SF-1-binding sites at  $-3.5$  kb upstream of the *ALAS1* gene in KGN cells (Fig. 6G). These observations indicate that SF-1 and PGC-1 $\alpha$  synergistically activated *ALAS1* gene expression via the two SF-1-binding sites near  $-3.5$  kb upstream of the human *ALAS1* gene.

Finally, we examined the participation of SF-1-dependent activation of *ALAS1* gene expression in steroid hormone production by steroidogenic cells. As shown in Fig. 7, knockdown of *ALAS1* expression by siRNA resulted in decreased progesterone production by KGN cells (*P* < 0.01, Fig. 7A) and mouse adrenocortical Y1 cells (*P* < 0.01, Fig. 7B). In both cases, gene expression of *StAR*, *CYP11A1*, and  $3\beta$ -HSD (*HSD3B2* in human and *Hsd3b1* in mouse), all of which are essential for synthesis of progesterone from cholesterol, was unchanged (Supplemental Fig. 5). Protein levels of P450<sub>scc</sub> (encoded by *Cyp11a1*) was also unchanged in Y1 cells (Supplemental Fig. 5). This

observation indicates that expression levels of *ALAS1* reflected steroid hormone production in steroidogenic cells.

## Discussion

Because we have shown previously that introduction of SF-1 into MSCs induces differentiation into steroidogenic cells (4), the identification of genes that are regulated by SF-1 during differentiation would be valuable to identify factors for steroidogenesis. Thus far, more than 30 genes have been identified as target genes of SF-1, including most steroidogenic enzymes (38). Furthermore, angiogenesis-related genes, such as *angiopoietin 2* (39) and *sterol O-acyltransferase 1* (40), have been identified as SF-1-target genes in H295R cells of a human adrenocortical origin by promoter tiling array (ChIP-on-chip analysis) and DNA microarray (gene expression analysis), respectively. In this study, we performed a combined analysis with promoter tiling array and DNA microarray using differentiated steroidogenic cells from hMSCs, and identified 10 genes as novel SF-1-target genes (Fig. 1B). Interestingly, SF-1 worked not only as an activator, but also a suppressor of three genes among the identified 10 genes. Although SF-1-suppressive genes have not been reported, nuclear re-



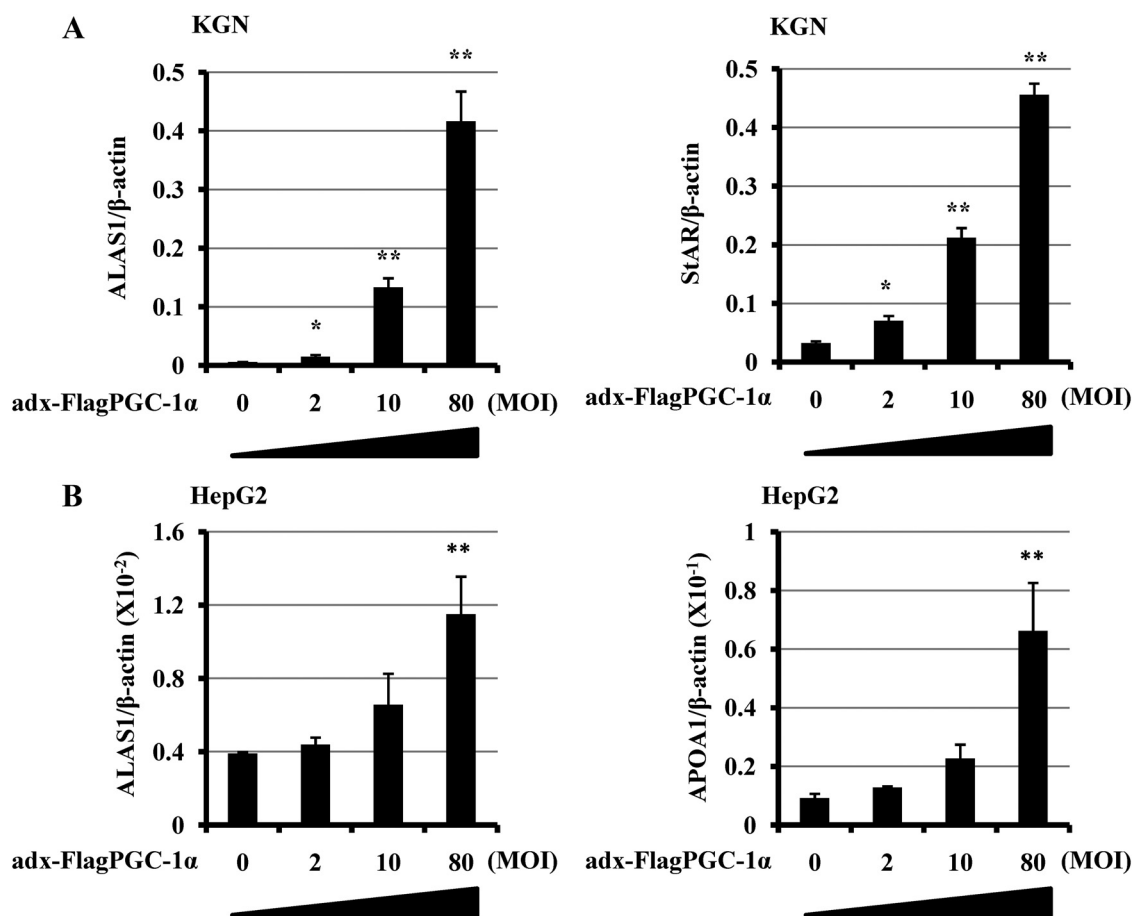

**FIG. 5.** Effects of adenovirus-mediated transduction of PGC-1 $\alpha$  on *ALAS1* gene expression in KGN and HepG2 cells. **A**, *ALAS1* gene expression is markedly induced in a dose-dependent manner by adenovirus-mediated transduction of PGC-1 $\alpha$  into KGN cells. Induction of *StAR* gene expression by PGC-1 $\alpha$  is shown as a positive control. **B**, *ALAS1* gene expression is also induced in a dose-dependent manner by adenovirus-mediated transduction of PGC-1 $\alpha$  into HepG2 cells. Induction of *APOA1* gene expression by PGC-1 $\alpha$  is shown as a positive control. \*,  $P < 0.05$ ; and \*\*,  $P < 0.01$  vs. control. Note: protein expression of PGC-1 $\alpha$  in these cells is shown by Western blotting in Supplemental Fig. 2.

ceptors can generally work as suppressors (41). Therefore, mechanisms for SF-1-dependent suppression of gene expression may exist.

We investigated *ALAS1* among the 10 novel genes for the following reasons. In humans, ALAS enzymes are encoded by two genes: *ALAS1*, a housekeeping gene, and *ALAS2*, a erythroid-specific gene (6). Some housekeeping genes are expressed at various levels among tissues and may be controlled in a tissue-specific manner due to their specific functions. For example, 3-oxoacid coenzyme A transferase 1, a key enzyme for ketone body degradation, provides an alternative energy source to many tissues during fasting, but it is repressed in the adult liver (42). Similarly, expression of *ALAS1*, a rate-limiting enzyme for heme biosynthesis, may be controlled in a tissue-specific manner, particularly in steroidogenic organs and the liver, because heme is essential for the activities of all cytochrome P450 enzymes that play essential roles in steroidogenesis and drug metabolism.

In the liver, transcriptional regulation of *ALAS1* is well characterized. Transcriptional complexes of brain and muscle arnt-like protein-1 and neuronal periodic acid Schiff PAS domain protein 2, which are clock-controlling genes, as well as bile acid-activated FXR regulate *ALAS1* in a liver specific-manner (43, 44). PGC-1 $\alpha$  is also involved in *ALAS1* gene activation in the liver by forming a complex with FOXO1 and NRF-1 at the promoter region of *ALAS1* (9). On the other hand, in this study, two SF-1-binding sites –3.5 kb upstream were shown to be quite important for *ALAS1* gene transcription in steroidogenic cells. Introduction of SF-1 results in activation of *ALAS1* reporter genes containing the SF-1 sites (Fig. 2). In fact, both SF-1 and LRH-1 bind to the upstream SF-1 sites in steroidogenic cells [in differentiated MSCs (Fig. 2A) and in KGN cells (Fig. 4A)], whereas no specific binding of LRH-1 is observed in hepatic HepG2 cells (Fig. 4B). Gene expression of *ALAS1* is also dependent on both SF-1 (Fig. 3) and LRH-1 (Fig. 4C) in steroidogenic cells including

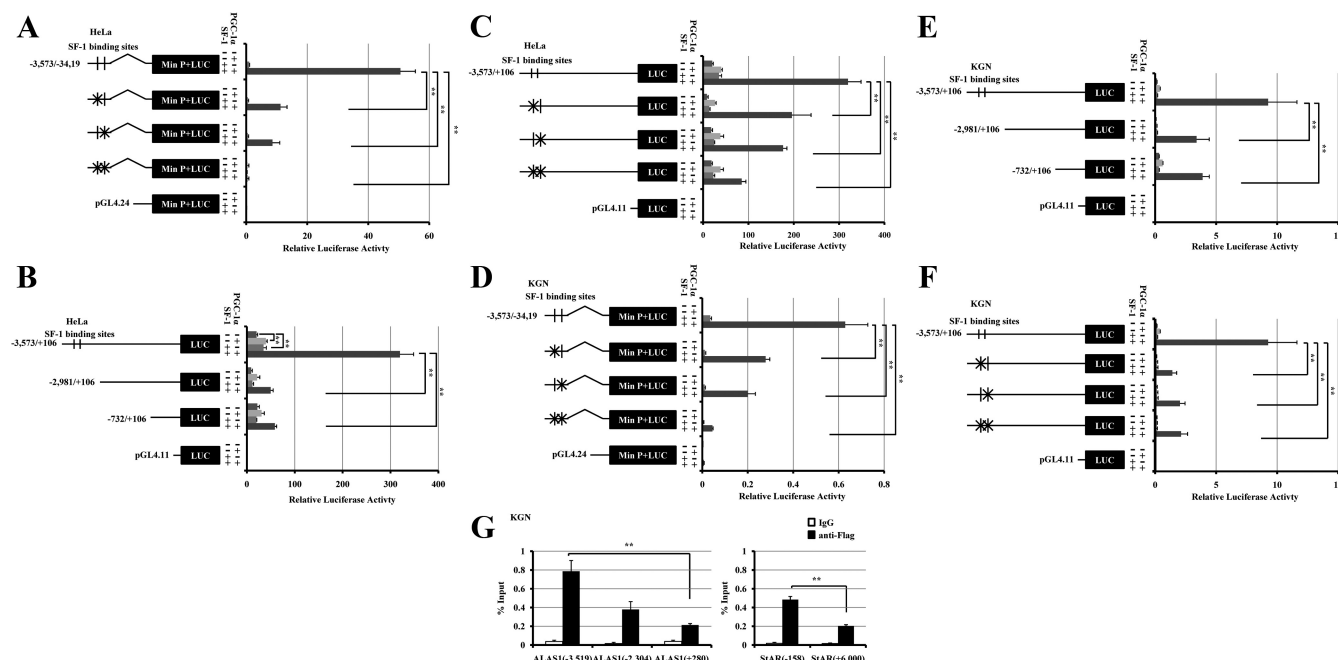

**FIG. 6.** Synergistic activation of an *ALAS1* reporter gene by SF-1 and PGC-1 $\alpha$ . A, A reporter vector containing a DNA fragment (–3573/+3419) upstream of the *ALAS1* gene fused to a minimal promoter was cotransfected with SF-1 and/or PGC-1 $\alpha$  expression vectors into HeLa cells. The effects of mutations in SF-1-binding sites of the reporter were also examined. Marked synergistic activation by SF-1 and PGC-1 $\alpha$  is observed, and mutations in each or both SF-1 sites markedly decrease reporter activities caused by the synergistic effects of SF-1 and PGC-1 $\alpha$ . B, Reporter constructs containing DNA fragments of various lengths from the upstream region of the *ALAS1* gene were cotransfected with SF-1 and/or PGC-1 $\alpha$  expression vectors into HeLa cells. Synergistic activation by SF-1 and PGC-1 $\alpha$  is observed only in the longest construct containing the SF-1 sites. C, Mutations were introduced into the SF-1-binding sites of the longest construct (–3573/+106), and reporter activities were measured in HeLa cells. Mutations in each or both SF-1 sites markedly decrease synergistic activation of the reporters. D, Synergistic activation by SF-1 and PGC-1 $\alpha$  was also examined in KGN cells of an ovarian granulosa origin. A reporter vector in panel A was used and cotransfected into KGN cells with SF-1 and/or PGC-1 $\alpha$  expression vectors. The effects of mutations were also examined. Marked synergistic activation by SF-1 and PGC-1 $\alpha$  is observed, and mutations in each or both SF-1 sites markedly decrease the synergistic effects. E, Reporter constructs containing DNA fragments of various lengths from the upstream region of the *ALAS1* gene were cotransfected with SF-1 and/or PGC-1 $\alpha$  expression vectors into KGN cells. Synergistic activation is observed only in the longest construct containing the SF-1 sites. F, Mutations were introduced in the SF-1-binding sites of the longest construct (–3573/+106), and reporter activities were measured in KGN cells. Mutations in each or both SF-1 sites decrease the synergistic activation of reporters. A–F, HeLa and KGN cells were transiently transfected with the indicated reporter or expression vectors. Luciferase activities were measured at 48 h after transfection. \*\*, *P* < 0.01 vs. control. G, PGC-1 $\alpha$  binding to the upstream region of the *ALAS1* gene in KGN cells was examined by ChIP analysis. Flag-tagged PGC-1 $\alpha$  (20 MOI) along with SF-1 (10 MOI) were expressed in KGN cells by adenovirus infection, and PGC-1 $\alpha$  binding was analyzed by a ChIP assay using an anti-Flag antibody or a nonimmune IgG for negative control. Strong binding is observed near –3.5 kb upstream. PGC-1 $\alpha$  binding to the neighborhood of the *Star* gene (SF-1-target in steroidogenic cells) is shown as positive (–158) and negative (+6000) controls. \*\*, *P* < 0.01 vs. control. LUC, Luciferase; Min, minimal.

differentiated MSCs, whereas no such induction is observed by transduction of LRH-1 into HepG2 cells (Fig. 4D). These observations suggest that different tissue-specific regulation of the *ALAS1* gene exists in liver and steroidogenic tissues, and such regulation in the latter is dependent on NR5A. The idea is further supported by immunohistochemical observations that *ALAS1*, SF-1, and steroidogenic enzymes were predominantly expressed in adrenocortical cells (Fig. 3, N and O). These observations strengthened the biological significance of *ALAS1* in adrenal steroidogenesis *in vivo*.

Cell type-specific regions of nuclear receptor binding have been demonstrated by ChIP-based genome-wide analyses of progesterone (45) and glucocorticoid (46) receptors. In this study, we also showed cell-type specific binding of the NR5A family to the upstream region of the *ALAS1* gene, which may cause up-regulation of the

*ALAS1* gene in steroidogenic tissues to supply a sufficient amount of heme as a prosthetic group of all P450 cytochrome steroidogenic enzymes. Nakajima *et al.* (47) reported that *ALAS1* expression is quite high in adrenocortical and testicular Leydig cells, as well as in the liver by analysis of a GFP knock-in mouse at the *ALAS1* gene site, and speculated that the high expression was necessary to supply heme molecules for steroid synthesis. This hypothesis is supported by our observation in which knockdown of *ALAS1* expression results in decreased progesterone production by steroidogenic KGN and Y1 cells (Fig. 7).

*In vivo* studies have shown that *ALAS1* expression is induced by tropic hormones in steroid hormone-producing tissues, *i.e.* ovary (48), testis (49), and adrenal gland (50). It is well known that tropic hormones also induce the expression of steroid hormone-synthesizing enzymes including P450 heme proteins to strongly up-regulate ste-

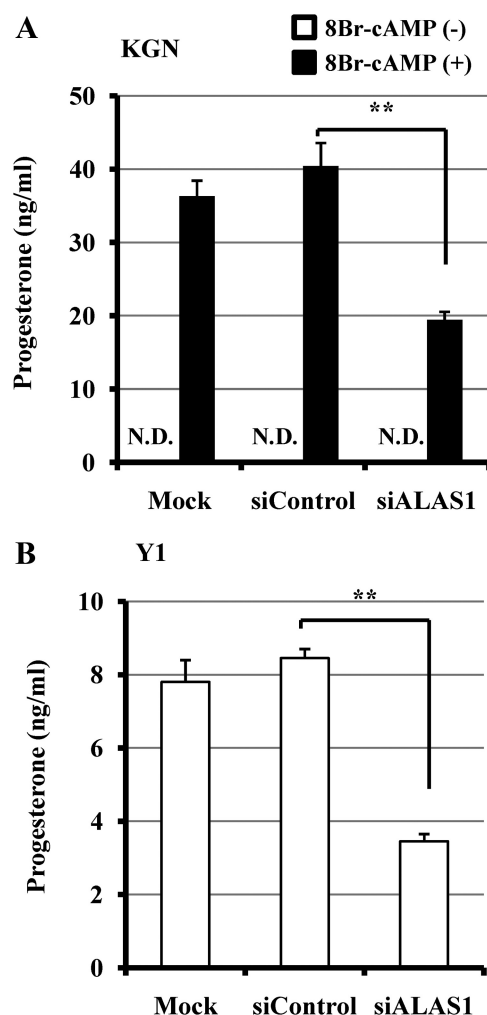

**FIG. 7.** Effects of *ALAS1* knockdown on progesterone production by steroidogenic cells. KGN cells (A) and Y1 cells (B) were transfected with siALAS1 or siControl oligo nucleotides. After transfection, KGN cells were treated with or without 8Br-cAMP for 48 h, whereas Y1 cells were not treated. Culture medium was replaced every 24 h. Medium was collected at 48 h after transfection for progesterone at the end of culture. Progesterone levels were measured by an ELISA kit. Progesterone production is reduced by siRNA treatments. N.D., Not detected. \*\*,  $P < 0.01$  vs. control.

roid hormone production. *ALAS1* could play important roles for steroidogenesis via heme supply to the enzymes. Tropic hormones activate cAMP-protein kinase A pathway, which leads to an ultimate increase in SF-1/LRH-1 activity (38). *ALAS1* expression could be enhanced by tropic hormone, at least in part, via SF-1/LRH-1 activity *in vivo*.

The importance of the electron-transfer system in steroidogenesis is also demonstrated by P450 oxidoreductase (POR), a microsomal enzyme that transfers electrons to various P450 steroidogenic enzymes, involvement in steroidogenesis as an SF-1-target gene (32), and mutations in the *POR* gene or deletion of the *POR* promoter region causes the congenital steroid hormone-deficient syn-

drome, Antley-Bixler (51, 52). We speculate that novel SF-1-target genes, including *ALAS1*, may be responsible, to a certain extent, for congenital steroid hormone deficiencies of an unknown cause.

PGC-1 $\alpha$  is a key regulator of various metabolic pathways in skeletal muscle, fat, and liver (53). Recently, we reported that PGC-1 $\alpha$  markedly increases progesterone production by ovarian granulosa cells via SF-1/LRH-1 (25). In this study, similar to other NR5A-target genes, we showed that PGC-1 $\alpha$  strongly augments *ALAS1* gene expression induced by SF-1 (Figs. 5 and 6). Because mutations in SF-1-binding sites –3.5 kb upstream of *ALAS1* markedly reduce the coactivator activity of PGC-1 $\alpha$  in steroidogenic cells, it is likely that PGC-1 $\alpha$  forms a complex with SF-1 or LRH-1 bound to the –3.5 kb upstream SF-1 sites. However, the coactivator activity of PGC-1 $\alpha$  was not completely abolished by mutation or deletion of the –3.5 kb upstream SF-1 sites (Fig. 6). These results were consistent with the observation that knockdown of SF-1 did not completely abolish the PGC-1 $\alpha$ -induced *ALAS1* expression in KGN cells (Supplemental Fig. 3). Although PGC-1 $\alpha$  is a strong transcriptional coactivator of NR5A family, PGC-1 $\alpha$  could co-activate not only NR5A family but also certain nuclear factors that bind to the *ALAS1* upstream region elsewhere in steroidogenic cells to slightly up-regulate *ALAS1* transcription.

In the liver, on the other hand, it has been reported that PGC-1 $\alpha$  augments *ALAS1* gene expression via coactivation of FOXO1 and NRF-1 transcription factors bound to the promoter region (9). We found that PGC-1 $\alpha$  induces *ALAS1* gene expression not only in steroidogenic cells, but also in hepatic cells (Fig. 5). However, because LRH-1 cannot bind to the –3.5 kb upstream region of *ALAS1* and shows only slight effects on *ALAS1* gene expression in hepatic cells (Fig. 4, B and D), PGC-1 $\alpha$  may not act via NR5A, but via other transcription factors such as FOXO1 and NRF-1 in hepatic cells. This suggestion is consistent with previous reports describing that PGC-1 $\alpha$  can form complexes with various transcription factors to activate genes in various tissues.

Finally, we showed the importance of *ALAS1* gene expression for steroidogenesis. Knockdown of *ALAS1* expression in steroidogenic cells results in reduced progesterone production by cells, indicating that *ALAS1* is involved in steroidogenesis via the supply of heme as a prosthetic group of P450 steroid hormone-synthesizing enzymes.

In conclusion, we identified *ALAS1* as a novel SF-1-target gene, and SF-1/LRH-1 up-regulates *ALAS1* gene transcription via binding to a 3.5-kb upstream region of the *ALAS1* transcription start site in a cell type-specific manner. PGC-1 $\alpha$  strongly augments *ALAS1* gene tran-

scription via coactivating SF-1 bound to the 3.5-kb upstream region. Knockdown of *ALAS1* results in reduced progesterone production by steroidogenic cells, suggesting that *ALAS1* is involved in steroidogenesis and may be a gene responsible for certain genetic disorders of steroidogenesis. Further study is clearly needed to elucidate such a possibility.

## Acknowledgments

We thank Dr. T. Yanase (Fukuoka University, Fukuoka, Japan) for providing KGN cells; Dr. H. Takemori (National Institute of Biomedical Innovation, Osaka, Japan) for providing H295R cells; J. Toguchida (Kyoto University, Kyoto, Japan) for providing hMSC-hTERT-E6/E7 cells; and K. Morohashi (University of Kyushu, Fukuoka, Japan) for providing anti-Ad4BP/SF-1 antibody. We thank Dr. K. Kokame (National Cardiovascular Center Research Institute, Osaka, Japan) for helping with the DNA microarray experiment. We also thank Ms. K. Matsuura, H. Fujii, Y. Yamazaki, and Y. Usami for technical assistance and Y. Inoue for administrative assistance.

Address all correspondence and requests for reprints to: Tet-suya Mizutani, Department of Biochemistry, Faculty of Medical Sciences, University of Fukui, 23-3 Shimoaizuki, Matsuoka, Eihei-ji, Fukui 910-1193, Japan. E-mail: mizutani@u-fukui.ac.jp.

This work was supported by a grant from the Health and Labor Sciences Research grant; a grant from the Ministry of Education, Culture, Sports, Science and Culture; the Smoking Research Foundation; Kanzawa Medical Research Foundation; and Takeda Science Foundation.

Disclosure Summary: All authors have nothing to disclose.

## References

1. Luo X, Ikeda Y, Parker KL 1994 A cell-specific nuclear receptor is essential for adrenal and gonadal development and sexual-differentiation. *Cell* 77:481–490
2. Luo X, Ikeda Y, Lala DS, Baity LA, Meade JC, Parker KL 1995 A cell-specific nuclear receptor plays essential roles in adrenal and gonadal development. *Endocr Res* 21:517–524
3. Parker KL, Schimmer BP 1997 Steroidogenic factor 1: A key determinant of endocrine development and function. *Endocr Rev* 18:361–377
4. Yazawa T, Mizutani T, Yamada K, Kawata H, Sekiguchi T, Yoshino M, Kajitani T, Shou Z, Umezawa A, Miyamoto K 2006 Differentiation of adult stem cells derived from bone marrow stroma into Leydig or adrenocortical cells. *Endocrinology* 147:4104–4111
5. May BK, Dogra SC, Sadlon TJ, Bhasker CR, Cox TC, Bottomley SS 1995 Molecular regulation of heme-biosynthesis in higher vertebrates. *Prog Nucleic Acid Res Mol Biol* 51:1–51
6. Bishop DF, Henderson AS, Astrin KH 1990 Human delta-aminolevulinic synthase: assignment of the housekeeping gene to 3p21 and the erythroid-specific gene to the X chromosome. *Genomics* 7:207–214
7. Martini CN, Vaena de Avalos SG, Romero DG, San Martin de Viale L, Vila Mde C 1997 Heme availability affects corticosterone and aldosterone biosynthesis in rat adrenal. *Steroids* 62:767–770
8. Bellino FL, Hussa RO 1985 Estrogen synthetase stimulation by heme in human choriocarcinoma cell culture. *Biochem Biophys Res Commun* 127:232–238
9. Handschin C, Lin J, Rhee J, Peyer AK, Chin S, Wu PH, Meyer UA, Spiegelman BM 2005 Nutritional regulation of hepatic heme biosynthesis and porphyria through PGC-1  $\alpha$ . *Cell* 122:505–515
10. Podvinec M, Handschin C, Looser R, Meyer UA 2004 Identification of the xenosensors regulating human 5-aminolevulinic synthase. *Proc Natl Acad Sci USA* 101:9127–9132
11. Lala DS, Rice DA, Parker KL 1992 Steroidogenic factor I, a key regulator of steroidogenic enzyme expression, is the mouse homolog of fushi tarazu-factor I. *Mol Endocrinol* 6:1249–1258
12. Morohashi K, Honda S, Inomata Y, Handa H, Omura T 1992 A common trans-acting factor, Ad4-binding protein, to the promoters of steroidogenic P-450s. *J Biol Chem* 267:17913–17919
13. Galarneau L, Paré JF, Allard D, Hamel D, Levesque L, Tugwood JD, Green S, Bélanger L 1996 The  $\alpha_1$ -fetoprotein locus is activated by a nuclear receptor of the Drosophila FTZ-F1 family. *Mol Cell Biol* 16:3853–3865
14. Goodwin B, Jones SA, Price RR, Watson MA, McKee DD, Moore LB, Galardi C, Wilson JG, Lewis MC, Roth ME, Maloney PR, Willson TM, Kiewer SA 2000 A regulatory cascade of the nuclear receptors FXR, SHP-1, and LRH-1 represses bile acid biosynthesis. *Mol Cell* 6:517–526
15. Lu TT, Makishima M, Repa JJ, Schoonjans K, Kerr TA, Auwerx J, Mangelsdorf DJ 2000 Molecular basis for feedback regulation of bile acid synthesis by nuclear receptors. *Mol Cell* 6:507–515
16. Hinshelwood MM, Repa JJ, Shelton JM, Richardson JA, Mangelsdorf DJ, Mendelson CR 2003 Expression of LRH-1 and SF-1 in the mouse ovary: localization in different cell types correlates with differing function. *Mol Cell Endocrinol* 207:39–45
17. Duggavathi R, Volle DH, Matak C, Antal MC, Messaddeq N, Auwerx J, Murphy BD, Schoonjans K 2008 Liver receptor homolog 1 is essential for ovulation. *Genes Dev* 22:1871–1876
18. Mizutani T, Yazawa T, Ju Y, Imamichi Y, Uesaka M, Inaoka Y, Matsuura K, Kamiki Y, Oki M, Umezawa A, Miyamoto K 2010 Identification of a novel distal control region upstream of the human steroidogenic acute regulatory protein (StAR) gene that participates in SF-1-dependent chromatin architecture. *J Biol Chem* 285:28240–28251
19. Handschin C, Spiegelman BM 2006 Peroxisome proliferator-activated receptor  $\gamma$  coactivator 1 coactivators, energy homeostasis, and metabolism. *Endocr Rev* 27:728–735
20. Puigserver P, Wu Z, Park CW, Graves R, Wright M, Spiegelman BM 1998 A cold-inducible coactivator of nuclear receptors linked to adaptive thermogenesis. *Cell* 92:829–839
21. Lin J, Wu H, Tarr PT, Zhang CY, Wu Z, Boss O, Michael LF, Puigserver P, Isotani E, Olson EN, Lowell BB, Bassel-Duby R, Spiegelman BM 2002 Transcriptional co-activator PGC-1  $\alpha$  drives the formation of slow-twitch muscle fibres. *Nature* 418:797–801
22. Vega RB, Huss JM, Kelly JM 2000 The coactivator PGC-1 cooperates with peroxisome proliferator-activated receptor  $\alpha$  in transcriptional control of nuclear genes encoding mitochondrial fatty acid oxidation enzymes. *Mol Cell Biol* 20:1868–1876
23. Yoon JC, Puigserver P, Chen G, Donovan J, Wu Z, Rhee J, Adelmant G, Stafford J, Kahn CR, Granner DK, Newgard CB, Spiegelman BM 2001 Control of hepatic gluconeogenesis through the transcriptional coactivator PGC-1. *Nature* 413:131–138
24. Herzig S, Long F, Jhala US, Hedrick S, Quinn R, Bauer A, Rudolph D, Schutz G, Yoon C, Puigserver P, Spiegelman B, Montminy M 2001 CREB regulates hepatic gluconeogenesis through the coactivator PGC-1. *Nature* 413:179–183
25. Yazawa T, Inaoka Y, Okada R, Mizutani T, Yamazaki Y, Usami Y, Kuribayashi M, Orisaka M, Umezawa A, Miyamoto K 2010



- PPAR- $\gamma$  coactivator-1  $\alpha$  regulates progesterone production in ovarian granulosa cells with sf-1 and Lrh-1. *Mol Endocrinol* 24:485–496
26. Okamoto T, Aoyama T, Nakayama T, Nakamata T, Hosaka T, Nishijo K, Nakamura T, Kiyono T, Toguchida J 2002 Clonal heterogeneity in differentiation potential of immortalized human mesenchymal stem cells. *Biochem Biophys Res Commun* 295:354–361
  27. Mori T, Kiyono T, Imabayashi H, Takeda Y, Tsuchiya K, Miyoshi S, Makino H, Matsumoto K, Saito H, Ogawa S, Sakamoto M, Hata J, Umezawa A 2005 Combination of hTERT and bmi-1, E6, or E7 induces prolongation of the life span of bone marrow stromal cells from an elderly donor without affecting their neurogenic potential. *Mol Cell Biol* 25:5183–5195
  28. Nishi Y, Yanase T, Mu Y, Oba K, Ichino I, Saito M, Nomura M, Mukasa C, Okabe T, Goto K, Takayanagi R, Kashimura Y, Haji M, Nawata H 2001 Establishment and characterization of a steroidogenic human granulosa-like tumor cell line, KGN, that expresses functional follicle-stimulating hormone receptor. *Endocrinology* 142:437–445
  29. Rainey WE, Bird IM, Sawetawan C, Hanley NA, McCarthy JL, McGee EA, Wester R, Mason JI 1993 Regulation of human adrenal carcinoma cell (NCI-H295) production of c19 steroids. *J Clin Endocrinol Metab* 77:731–737
  30. Mizutani T, Yamada K, Minegishi T, Miyamoto K 2000 Transcriptional regulation of rat scavenger receptor class B type I gene. *J Biol Chem* 275:22512–22519
  31. Abe Y, Sinozaki H, Takagi T, Minegishi T, Kokame K, Kangawa K, Uesaka M, Miyamoto K 2006 Identification of 2,3,7,8-tetrachlorodibenzo-p-dioxin (TCDD)-inducible genes in human amniotic epithelial cells. *Reprod Biol Endocrinol* 4:27
  32. Inaoka Y, Yazawa T, Mizutani T, Kokame K, Kangawa K, Uesaka M, Umezawa A, Miyamoto K 2008 Regulation of P450 oxidoreductase by gonadotropins in rat ovary and its effect on estrogen production. *Reprod Biol Endocrinol* 6:62
  33. Yazawa T, Inanoka Y, Mizutani T, Kuribayashi M, Umezawa A, Miyamoto K 2009 Liver receptor homolog-1 regulates the transcription of steroidogenic enzymes and induces the differentiation of mesenchymal stem cells into steroidogenic cells. *Endocrinology* 150:3885–3893
  34. Mizutani T, Yamada K, Yazawa T, Okada T, Minegishi T, Miyamoto K 2001 Cloning and characterization of gonadotropin-inducible ovarian transcription factors (GIOT1 and -2) that are novel members of the (Cys)(2)-(His)(2)-type zinc finger protein family. *Mol Endocrinol* 15:1693–1705
  35. Krylova IN, Sablin EP, Moore J, Xu RX, Waitt GM, MacKay JA, Juzumiene D, Bynum JM, Madauss K, Montana V, Lebedeva L, Suzawa M, Williams JD, Williams SP, Guy RK, Thornton JW, Fletcher RJ, Willson TM, Ingraham HA 2005 Structural analyses reveal phosphatidyl inositols as ligands for the NR5 orphan receptors SF-1 and LRH-1. *Cell* 120:343–355
  36. Delerive P, Galardi CM, Bisi JE, Nicodeme E, Goodwin B 2004 Identification of liver receptor homolog-1 as a novel regulator of apolipoprotein A1 gene transcription. *Mol Endocrinol* 18:2378–2387
  37. Barski A, Cuddapah S, Cui K, Roh TY, Schones DE, Wang Z, Wei G, Chepelev I, Zhao K 2007 High-resolution profiling of histone methylations in the human genome. *Cell* 129:823–837
  38. Schimmer BP, White PC 2010 Minireview: Steroidogenic factor 1: its roles in differentiation, development, and disease. *Mol Endocrinol* 24:1322–1337
  39. Ferraz-de-Souza B, Lin L, Shah S, Jina N, Hubank M, Dattani MT, Achermann JC 2011 ChIP-on-chip analysis reveals angiotensin 2 (Ang2, ANGPT2) as a novel target of steroidogenic factor-1 (SF-1, NR5A1) in the human adrenal gland. *FASEB J* 25:1166–1175
  40. Ferraz-de-Souza B, Hudson-Davies RE, Lin L, Parnaik R, Hubank M, Dattani MT, Achermann JC 2011 Sterol O-acyltransferase 1 (SOAT1, ACAT) is a novel target of steroidogenic factor-1 (SF-1, NR5A1, Ad4BP) in the human adrenal. *J Clin Endocrinol Metab* 96:E663–E668
  41. Rosenfeld MG, Lunyak VV, Glass CK 2006 Sensors and signals: a coactivator/corepressor/epigenetic code for integrating signal-dependent programs of transcriptional response. *Genes Dev* 20:1405–1428
  42. Thorrez L, Laudadio I, Van Deun K, Quintens R, Hendrickx N, Granvik M, Lemaire K, Schraenen A, Van Lommel L, Lehnert S, Aguayo-Mazzucato C, Cheng-Xue R, Gilon P, Van Mechelen I, Bonner-Weir S, Lemaigre F, Schuit F 2011 Tissue-specific disallowance of housekeeping genes: the other face of cell differentiation. *Genome Res* 21:95–105
  43. Kaasik K, Lee CC 2004 Reciprocal regulation of haem biosynthesis and the circadian clock in mammals. *Nature* 430:467–471
  44. Peyer AK, Jung D, Beer M, Gnerre C, Keogh A, Stroka D, Zavolan M, Meyer UA 2007 Regulation of human liver  $\delta$ -aminolevulinic acid synthase by bile acids. *Hepatology* 46:1960–1970
  45. Yin P, Roqueiro D, Huang L, Owen JK, Xie A, Navarro A, Monsivais D, Coon V JS, Kim JJ, Dai Y, Bulun SE 2012 Genome-wide progesterone receptor binding: cell type-specific and shared mechanisms in T47D breast cancer cells and primary leiomyoma cells. *PLoS ONE* 7:e29021
  46. John S, Sabo PJ, Johnson TA, Sung MH, Biddie SC, Lightman SL, Voss TC, Davis SR, Meltzer PS, Stamatoyannopoulos JA, Hager GL 2008 Interaction of the glucocorticoid receptor with the chromatin landscape. *Mol Cell* 29:611–624
  47. Okano S, Zhou L, Kusaka T, Shibata K, Shimizu K, Gao X, Kikuchi Y, Togashi Y, Hosoya T, Takahashi S, Nakajima O, Yamamoto M 2010 Indispensable function for embryogenesis, expression and regulation of the nonspecific form of the 5-aminolevulinate synthase gene in mouse. *Genes Cells* 15:77–89
  48. Seo YM, Park JI, Jeon MJ, Park EW, Park JK, Lee HC, Chang WK, Chun SY 2009 Gonadotropin regulation of genes differentially expressed in response to PKC  $\zeta$  inhibitor during ovulation in the rat. *Life Sci* 85:153–160
  49. Srivastava G, Borthwick IA, Maguire DJ, Elferink CJ, Bawden MJ, Mercer JF, May BK 1988 Regulation of 5-aminolevulinate synthase mRNA in different rat tissues. *J Biol Chem* 263:5202–5209
  50. Martini CN, Romero DG, Yanes LL, Vila Mdel C 2007 Induction of 5-aminolevulinate synthase by activators of steroid biosynthesis. *Life Sci* 81:19–25
  51. Flück CE, Tajima T, Pandey AV, Arlt W, Okuhara K, Verge CF, Jabs EW, Mendonça BB, Fujieda K, Miller WL 2004 Mutant P450 oxidoreductase causes disordered steroidogenesis with and without Antley-Bixler syndrome. *Nat Genet* 36:228–230
  52. Soneda S, Yazawa T, Fukami M, Adachi M, Mizota M, Fujieda K, Miyamoto K, Ogata T 2011 Proximal promoter of the cytochrome P450 oxidoreductase gene: identification of microdeletions involving the untranslated exon 1 and critical function of the SP1 binding sites. *J Clin Endocrinol Metab* 96:E1881–E1887
  53. Lin J, Handschin C, Spiegelman BM 2005 Metabolic control through the PGC-1 family of transcription coactivators. *Cell Metab* 1:361–370
